# Supplementary material for: Novel synthesis of fluorochrome-coupled zoledronate with preserved functional activity on gamma/delta T cells and tumor cells
Source: Royal Society of Chemistry journal article supplement (doi:10.1039/c5md00063g), 2015-01-01
Supplement: c5md00063g1.pdf [file c5md00063g1.pdf]

## Novel synthesis of fluorochrome-coupled zoledronate with preserved functional activity on gamma/delta T cells and tumor cells

Vijayanand Chandrasekaran<sup>a</sup>, Shirin Kalyan<sup>b,1</sup>, Valentina Biel<sup>b</sup>, Marcus Lettau<sup>b</sup>, Patrik Theodor Nerdal<sup>b</sup>, Hans-Heinrich Oberg<sup>b</sup>, Daniela Wesch<sup>b</sup>, Thisbe K. Lindhorst<sup>a</sup>, Dieter Kabelitz<sup>b</sup>

<sup>a</sup> Otto Diels Institute of Organic Chemistry, Christian-Albrechts-University of Kiel, Otto-Hahn-Platz 3, D-24118 Kiel, Germany

<sup>b</sup> Institute of Immunology, Christian-Albrechts-University of Kiel, Arnold-Heller-Straße 3, Bldg. 17, D-24105 Kiel, Germany

### Electronic Supplementary Information

#### Experimental Section

##### Synthesis of FluorZOL (see Figure 2):

Zoledronate (**4**, (2-imidazol-1-yl)-hydroxy-ethylidene-1,1-bisphosphonic acid, disodium salt) was a kind gift from Novartis Pharma AG, Basel, Switzerland. 5(6)-Carboxyfluorescein succinimidyl ester was purchased from Sigma Aldrich (Munich, Germany). Thin layer chromatography was performed on silica gel plates (GF 254, Merck). Flash chromatography was performed on silica gel 60 (Merck, 230-400 mesh, particle size 0.040-0.063 mm). For the purification of the zoledronate derivative **8**, the Biotage – Isolera One™ flash system was employed using a reversed-phase KP-C18-HS column. <sup>1</sup>H, <sup>13</sup>C and <sup>31</sup>P NMR spectra were recorded on Bruker DRX-500 and AV-600 spectrometers at 300 K. Chemical shifts are reported relative to internal tetramethylsilane ( $\delta = 0.00$  ppm) or D<sub>2</sub>O ( $\delta = 4.76$  ppm). Full assignment of NMR spectra was achieved with the aid of 2D NMR techniques. IR spectra were measured with a Perkin Elmer FT-IR Paragon 1000 (ATR) spectrometer. ESI mass spectra were recorded on Mariner instrument 5280. MALDI-TOF mass spectra were recorded on a Bruker Biflex III instrument with 19 kV acceleration voltage and an ionization laser at 337 nm. As matrix 2,5-dihydroxybenzoic acid (DHB) and  $\alpha$ -cyano-4-hydroxycinnamic acid were used.

**tert-Butyl N-allyl carbamate (2)**<sup>1</sup> To a solution of allylamine **1** (1.75 g, 30.7 mmol) in dry CH<sub>2</sub>Cl<sub>2</sub> (10 ml), a solution of (Boc)<sub>2</sub>O (6.54 g, 30.7 mmol) in CH<sub>2</sub>Cl<sub>2</sub> (20 ml) was added at 0

°C and the reaction mixture was stirred at ambient temperature for 4 h. Then, it was diluted with CH<sub>2</sub>Cl<sub>2</sub> (25 ml), washed with 5% citric acid (10 ml) and brine (10 ml). The organic phase was dried over Na<sub>2</sub>SO<sub>4</sub>, it was filtered and the filtrate evaporated under reduced pressure. Purification of the crude product by column chromatography (cyclohexane/ ethyl acetate, 1:4) gave 3.81 g (79%) of **2** as a white solid. mp 38 °C; R<sub>f</sub>=0.42 (cyclohexane/ethyl acetate,1:4); <sup>1</sup>H NMR (300 MHz, CDCl<sub>3</sub>): δ = 1.42 (s, 9H), 3.72 (m<sub>c</sub>, 2H), 4.68 (bs, 1H), 5.18-5.06 (m,2H), 5.81 (m, 1H) ppm; <sup>13</sup>C NMR (75 MHz, CDCl<sub>3</sub>): δ 28.3, 43.0, 79.3, 115.6, 134.9, 155.8 ppm; ESI MS (*m/z*): [M+Na]<sup>+</sup> calcd for C<sub>8</sub>H<sub>15</sub>NO<sub>2</sub>: 180.11; found 180.08; IR (ATR):  $\tilde{\nu}$  = 3340, 2979, 1676, 1524, 1363, 1251, 1162 cm<sup>-1</sup>.

**tert-Butyl N-(2-oxiranylmethyl) carbamate (3)**<sup>1</sup> The Boc-protected amine **2** (1.00 g, 6.37 mmol) was dissolved in dry CH<sub>2</sub>Cl<sub>2</sub> (50 ml) and *m*CPBA (2.80 g, 12.7 mmol) was added portion-wise over about 20 min at 0 °C. Then, stirring was continued at ambient temperature overnight (~ 16 h). The reaction mixture was diluted with CH<sub>2</sub>Cl<sub>2</sub> (100 ml), then washed with 10% Na<sub>2</sub>SO<sub>3</sub> (20 ml) and water (20 ml). The organic phase was dried over Na<sub>2</sub>SO<sub>4</sub>, it was filtered and the filtrate was concentrated under reduced pressure to get 1.00 g (91%) of the title epoxide **3** as colourless oil. R<sub>f</sub>= 0.18 (cyclohexane/ethylacetate,1:4); <sup>1</sup>H NMR (500 MHz; CDCl<sub>3</sub>): δ = 4.76 (bs, 1H), 3.51 (d, *J* = 12.1 Hz, 1H), 3.20 (ddd, *J* = 5.1 Hz, *J* = 6.3 Hz, *J* = 14.7 Hz, 1H), 3.07 (m<sub>c</sub>, 1H), 2.76 (dd, *J* = 4.1 Hz, *J* = 4.7 Hz, 1H), 2.57 (dd, *J* = 2.7 Hz, *J* = 4.8 Hz, 1H), 1.43 (s, 9H) ppm; <sup>13</sup>C NMR (125 MHz; CDCl<sub>3</sub>) δ 155.9, 79.6, 50.8, 44.9, 41.7, 28.3 ppm; ESI MS (*m/z*): [M+Na]<sup>+</sup> calcd for C<sub>8</sub>H<sub>15</sub>NO<sub>3</sub>: 196.11; found 196.06; IR (ATR):  $\tilde{\nu}$  = 3348, 2977, 2931, 1694, 1516, 1366, 1247, 1162 cm<sup>-1</sup>.

**N<sup>3</sup>-{3''-[3'/4'-carboxy-2'-(3-hydroxy-6-oxo-xanthen-9-yl)benzoylamido]-2''-**

**hydroxypropyl}-N<sup>1</sup>-(2-hydroxy-2,2-diphosphonoethyl)imidazolium (8)** The disodium salt of zoledronate (**4**, 200 mg, 0.629 mmol) was dissolved in water (4 ml, pH = 7.3) and the pH adjusted to 6.2 using 1 N aq HCl. Then, a solution of epoxide **3** (108 mg, 0.624 mmol) in MeOH (0.5 ml) was added and the reaction mixture stirred at 40 °C for 19 h. It was evaporated reduced pressure to get the crude coupling product **5** as a white solid (272 mg) which was used in the next reaction step without further purification. Thus, crude **5** (272 mg) was dissolved in a TFA-water mixture (1:1, 5 ml) and the reaction mixture was stirred at ambient temperature for 4 h. Then it was evaporated to dryness and the residue washed with diethyl ether (10 ml) and after another evaporation step amine **6** was obtained as a white solid (204 mg), which was used in next step without further purification.

Under exclusion of ambient light the intermediate **6** (200 mg) was dissolved in 0.1 N aq NaHCO<sub>3</sub> (1 ml, pH 7.1) and the pH adjusted to 8.3 with 0.1 N aq NaOH. Then a solution 5(6)-carboxyfluorescein succinimidyl ester (**7**, 40 mg, 84.6  $\mu$ mol) in DMF (200  $\mu$ l) was added. Immediately the reaction mixture turned into a dark orange-red solution with some precipitation occurring. The pH was adjusted to 8.1 with 0.1 N aq NaOH to get a homogenous reaction mixture and then stirring was continued at ambient temperature for 3 h. The solvents were evaporated under reduced pressure to get the crude product, which was purified by reversed-phase column chromatography (methanol/water, water 0 %  $\rightarrow$  50 %) to yield 178 mg (21% over three steps) of the fluorescently labeled conjugate **8** as an orange-red amorphous solid. <sup>1</sup>H NMR (600 MHz; D<sub>2</sub>O):  $\delta$  = 8.68 (s, 1H), 7.46-7.38 (m, 3H), 7.19 (d,  $J$  = 9.7 Hz, 2H), 7.16-7.11 (m, 2H), 6.64-6.59 (m, 4H), 4.83 (m<sub>c</sub>, 1H), 4.58-4.55 (m, 2H), 3.82 (dd,  $J$  = 2.9 Hz,  $J$  = 12.8 Hz, 1H), 3.72-3.61 (m, 2H), 3.41 (dd,  $J$  = 6.6 Hz,  $J$  = 9.2 Hz, 1H) ppm; <sup>13</sup>C NMR (150 MHz; D<sub>2</sub>O)  $\delta$  = 180.4, 179.5, 163.2, 162.9, 159.1, 153.6, 136.7, 131.4, 123.3, 122.9, 121.2, 117.3, 115.4, 103.7, 77.8, 62.2, 52.3, 41.6 ppm; <sup>31</sup>P NMR (202 MHz; D<sub>2</sub>O)  $\delta$  = 14.85, 14.14 ppm; MALDI-TOF MS ( $m/z$ ): [M+Na]<sup>+</sup> calcd for C<sub>29</sub>H<sub>28</sub>N<sub>3</sub>O<sub>14</sub>P<sub>2</sub>:  $m/z$  725.10; found 725.27; IR (ATR):  $\tilde{\nu}$  = 3350, 1678, 1676, 1393, 1204, 1130, 723 cm<sup>-1</sup>.

#### **Activation of $\gamma\delta$ T cells by FluorZOL:**

PBMC were obtained from blood of healthy donors by Ficoll-Hypaque density centrifugation. Informed consent was obtained from all donors. The studies were performed in compliance with the relevant laws and institutional guidelines, and were approved by the Ethics Committee of the Medical Faculty of University of Kiel. PBMC were cultured at 10<sup>5</sup> cells per well in 96-well round bottom plates in RPMI 1640 medium supplemented with antibiotics and 10% fetal calf serum. Cell cultures were further supplemented with titrated concentrations of ZOL or FluorZOL and 50 U/ml IL-2. Bromohydrin pyrophosphate (BrHPP, kindly provided by Innate Pharma, Marseille, France) was used as a positive control for  $\gamma\delta$  T cell expansion.<sup>2</sup> After 7 days, the absolute number of viable  $\gamma\delta$  T cells per microculture well was measured by flow cytometry as previously reported.<sup>3</sup> Briefly, cells contained in microculture wells were stained with PE-labeled anti-V $\delta$ 2 monoclonal antibody (Biolegend, Fell, Germany). After washing steps, a defined number of „standard cells“ (fixed lymphocytes that had been stained with FITC-labeled antibodies directed against HLA class I [clone w6/32] and T-cell receptor  $\alpha\beta$  [clone BMA031] 0.2  $\mu$ g/ml plus propidium iodide) were added and served as the standard to calculate absolute numbers of viable V $\delta$ 2 cells per well.<sup>3</sup> To generate short term lines of  $\gamma\delta$  T cells, PBMC (1x10<sup>6</sup> per ml) were cultured in the presence of 2.5  $\mu$ M ZOL and 50 U/ml IL-

2. IL-2 was freshly supplemented every other day. After 12 to 14 days, these cultures contained >90%  $\gamma\delta$  T cells, and were used as effector cells in a Real Time Cell Analyzer (RTCA) and cytotoxicity assays.<sup>4</sup>

### **Tumor cells and FluorZOL uptake:**

The following human tumor cell lines were obtained from the German Collection of Microorganisms and Cell Cultures (DSMZ, Braunschweig, Germany): monocytic leukemia THP-1 (ACC 16), histiocytic lymphoma U-937 (ACC 5), Burkitt lymphoma Daudi (ACC 78), Burkitt lymphoma Raji (ACC 319), erythroleukemia K-562 (ACC 10). Breast carcinoma cell lines MDA-MB231 (ATCC-HTB-26) and MCF7 (ATCC-HTB-22) were obtained from American Type Culture Collection (LGC Standards, Wesel, Germany). Pancreatic ductal adenocarcinoma cell lines Panc89, PancTu-I and Colo357 were kindly provided by Prof. H. Kalthoff (Institute of Experimental Oncology, University of Kiel). All cell lines were kept in RPMI 1640/10% fetal calf serum. To investigate the uptake of FluorZOL, tumor cells ( $5 \times 10^5$  per ml) were cultured for 4 and 24 hrs in 6-well culture plates in the absence or presence of titrated concentrations of FluorZOL. Thereafter, adherent cells were briefly (10 min) trypsinized, washed twice and resuspended in 1% paraformaldehyde. Trypsinization was omitted for suspension cells. Fluorescence was analyzed on a FACS Calibur flow cytometer (BD Biosciences, Heidelberg, Germany) using the CellQuestPro software. In some experiments, FluorZOL uptake was additionally investigated by ImageStream cytometry. To this end, MDA-MB231 cells were cultured for 20 hrs in the absence or presence of 20  $\mu$ M FluorZOL and 10  $\mu$ g/ml TRITC-dextran as described above. Dead cells were stained with the LIVE/DEAD fixable far red dead cell stain kit (Life Technologies) following the manufacturer's protocol. After washing, fluorescence images of 10.000 cells per sample were acquired with an Amnis ImageStream MK2 (EMD Millipore) employing 40x objective lenses. Brightfield images were acquired in Channel 1. FluorZOL, TRITC-dextran and the far red dye were excited at 488 nm, 561 nm and 642 nm, respectively. The corresponding fluorescence was detected in Channel 2, Channel 3 and Channel 5, respectively. For analysis, the files were merged and fluorophores were compensated employing Amnis IDEAS software and a compensation matrix generated from single-stained samples. Only single, viable and focussed cells were included in the analysis. Cells with a RMS gradient >50 were considered focussed. Single cells were identified by size and aspect ratio based on brightfield images. Far red dye-negative cells were considered viable.

### **Modulation of tumor cell sensitivity to $\gamma\delta$ T cell cytotoxicity by FluorZOL:**

Two independent assays were used to monitor killing of tumor cells by  $\gamma\delta$  T cells. The impedance of adherent PancTu-I and Colo357 tumor cells (5000 per well in 96-well micro-E-plate) as target cells was monitored with the Real Time Cell Analyzer (RTCA; ACEA, Bremen).<sup>4</sup> Tumor cells were pretreated for 24 hrs with 5  $\mu$ M ZOL or FluorZOL or medium before 100,000 short-term  $\gamma\delta$  T cell line cells (see above) were added. BrHPP was added as a positive control for  $\gamma\delta$  T cell activation, and wells containing 1% Triton-X-100 served as control for maximal lysis. Whenever  $\gamma\delta$  T effector cells induced lysis of the tumor cells, the loss of impedance of tumor cells was recorded. The cells were monitored every minute for 6 hrs and, thereafter, every 5 min for up to additional 20 hrs. In an independent approach,  $\gamma\delta$  T cell-resistant THP-1 acute monocytic leukemia cells were pretreated for 20 hrs with 100  $\mu$ M ZOL or FluorZOL or medium. After extensive washing, the THP-1 cells were labeled for 30 min at 37° C with 1  $\mu$ l calcein AM (Life Technologies).<sup>5</sup> After washing, the labeled target cells were cocultured with short-term cultured  $\gamma\delta$  T cell lines (see above) at various effector:target (E/T) cell ratios. Wells containing 1% Triton-X-100 served as control for maximal lysis. After 4 hrs, 100  $\mu$ l of supernatant were transferred to non-binding black  $\mu$ CLEAR<sup>®</sup> 96 well microplates (Greiner bio-one, Frickenhausen, Germany) and fluorescence intensities were measured using a Tecan microplate reader at 490 nm with reference filter at 530 nm. % specific lysis was calculated as follows:  $\text{OD}_{\text{experimental}} - \text{OD}_{\text{spontaneous}} / \text{OD}_{\text{maximal}} - \text{OD}_{\text{spontaneous}} \times 100$ .

### **References:**

- 1 Rocheblave, L.; Bihel, F.; De Michelis, C.; Priem, G.; Courcambeck, J.; Bonnet, B.; Chermann, J.-C.; Kraus, J.-L. Synthesis and antiviral activity of new anti-HIV amprenavir bioisosteres. *J. Med. Chem.* **2002**, 45, 3321-3334.
- 2 Espinosa, E.; Belmont, C.; Pont, F.; Luciani, B.; Poupot, R.; Romagné, F.; Brailly, H.; Bonneville, M.; Fournié, J. J. Chemical synthesis and biological activity of bromohydrin pyrophosphate, a potent stimulator of human  $\gamma\delta$  T cells. *J. Biol. Chem.* **2001**, 276, 18337-18344.
- 3 Pechhold, K.; Pohl, T.; Kabelitz, D. Rapid quantification of lymphocyte subsets in heterogeneous cell populations by flow cytometry. *Cytometry.* **1994**, 16, 152-159.
- 4 Oberg, H. H.; Peipp, M.; Kellner, C.; Sebens, S.; Krause, S.; Petrick, D.; Adam-Klages, S.; Röcken, C.; Becker, T.; Vogel, I.; Weisner, D.; Freitag-Wolf, S.; Gramatzki, M.; Kabelitz, D.; Wesch, D.

Novel bispecific antibodies increase  $\gamma\delta$  T-cell cytotoxicity against pancreatic cancer cells. *Cancer Res.* **2014**, 74, 1349-1360.

5 Neri, S.; Mariani, E.; Meneghetti, A.; Cattini, L.; Facchini, A. Calcein-acetyoxymethyl cytotoxicity assay: standardization of a method allowing additional analyses on recovered effector cells and supernatants. *Clin. Diagn. Lab. Immunol.* **2001**, 8, 1131-1135.

## Legends to Supplemental Figures

**Supplemental Figure 1: Uptake of FluorZOL by additional tumor cells.** Adherent tumor cells Colo357, Panc89 (both pancreatic ductal adenocarcinomas), MCF7 and MDA-MB231 (both breast carcinomas) (top) and suspension cell lines Daudi (Burkitt lymphoma), K-562 (erythroleukemia), and THP-1 (acute monocytic leukemia) were cultured for 4 (left) and 24 hrs (right) in the absence (thin grey line) or presence of 3.1 (dotted line), 12.5 (thin black line) or 50  $\mu$ M (thick black line) FluorZOL. After washing, the cells were resuspended in 1% paraformaldehyde and fluorescence intensity was measured on a FACS Calibur flow cytometer.

**Supplemental Figure 2: Effects of ZOL and FluorZOL on tumor cell growth.** To investigate direct effects of FluorZOL on tumor cells, tumor cells were cultured at  $5 \times 10^4$  per microculture well in RPMI 1640/10% fetal calf serum and titrated concentrations of ZOL and FluorZOL as indicated. After 1, 2 and 3 days, the viability of tumor cells was quantified by the cleavage of the tetrazolium salt XTT following the recommendations of the manufacturer (Cell Proliferation Kit II; Roche Diagnostics, Mannheim, Germany). Results are presented as mean values of triplicate determinations of optical density (O.D). Qualitatively similar results were obtained in two additional experiments.
