# Supplementary figures and images for: Novel synthesis of fluorochrome-coupled zoledronate with preserved functional activity on gamma/delta T cells and tumor cells
Source: Royal Society of Chemistry journal article supplement (doi:10.1039/c5md00063g), 2015-01-01

## Supplemental Figure 1

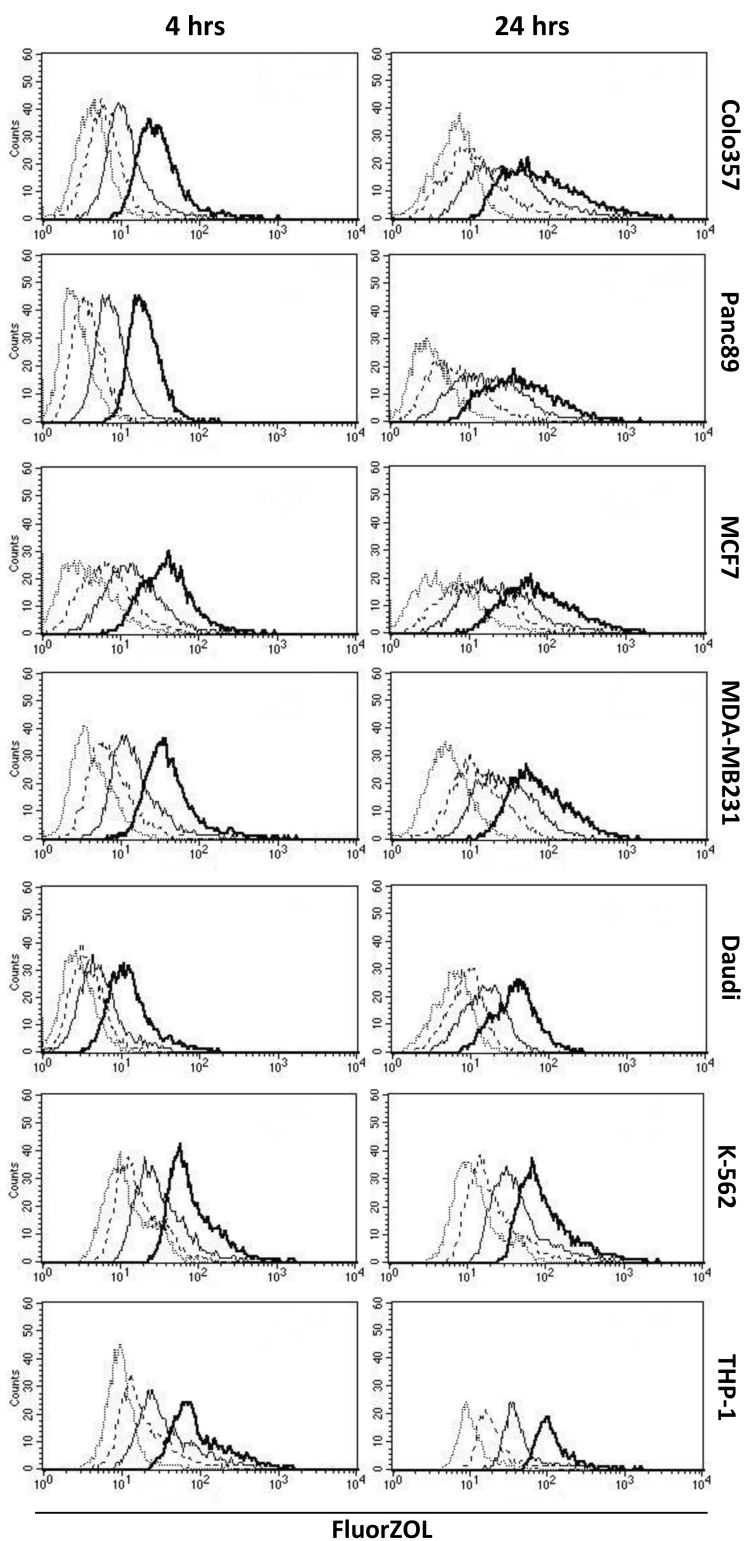

Supplement: c5md00063g2.pdf [file c5md00063g2.pdf]
